# Supplementary material for: Does Workers’ Compensation Status Affect Outcomes after Lumbar Spine Surgery? A Systematic Review and Meta-Analysis
Source: MDPI journal article supplement (doi:10.3390/ijerph18116165), 2021-06-07
Supplement: s1 [file s1]

|                 | D1 | D2 | D3 | D4 | D5 | D6 | D7 | Overall* |
|-----------------|----|----|----|----|----|----|----|----------|
| Agazzi 1999     | ?  | ?  | +  | +  | +  | ?  | -  | -        |
| Albert 2000     | ?  | +  | +  | ?  | +  | ?  | +  | ?        |
| Asch 2002       | +  | +  | +  | +  | +  | +  | +  | +        |
| Atlas 2000      | ?  | ?  | ?  | +  | +  | ?  | ?  | ?        |
| Carreon 2010    | ?  | +  | +  | ?  | ?  | +  | +  | ?        |
| Deutsch 2006    | +  | +  | +  | ?  | +  | ?  | ?  | ?        |
| Greenough 1994  | +  | +  | +  | +  | +  | +  | +  | +        |
| Greenough 1998  | +  | +  | +  | +  | +  | +  | +  | +        |
| Gum 2013        | +  | +  | +  | ?  | +  | ?  | ?  | ?        |
| Herron 1996     | +  | +  | +  | ?  | +  | ?  | ?  | ?        |
| Klekamp 1998    | +  | +  | ?  | ?  | +  | +  | +  | ?        |
| Lew 2001        | +  | +  | ?  | ?  | +  | +  | ?  | ?        |
| Mackay 1995     | +  | +  | +  | +  | +  | +  | +  | +        |
| Madan 2003      | +  | +  | +  | +  | +  | +  | +  | +        |
| Marks 2000      | +  | +  | +  | +  | +  | +  | +  | +        |
| Montgomery 2015 | -  | +  | ?  | +  | +  | +  | -  | -        |
| Parker 1996     | +  | +  | +  | +  | +  | +  | -  | -        |
| Pelton 2012     | +  | +  | +  | +  | +  | ?  | +  | ?        |
| Penta 1997      | ?  | +  | ?  | +  | ?  | +  | -  | -        |
| Phan 2017       | +  | +  | +  | +  | +  | +  | +  | +        |
| Rouben 2011     | +  | +  | +  | +  | ?  | +  | ?  | ?        |
| Sanderson 1999  | +  | +  | +  | +  | +  | +  | ?  | ?        |
| Schnee 1997     | ?  | +  | +  | +  | +  | +  | ?  | ?        |
| Slosar 2000     | ?  | +  | +  | +  | +  | ?  | -  | -        |
| Taylor 2000     | ?  | +  | +  | +  | +  | ?  | ?  | ?        |
| Vaccaro 1997    | ?  | +  | +  | +  | +  | ?  | ?  | ?        |
