# Supplementary material for: Does Workers’ Compensation Status Affect Outcomes after Lumbar Spine Surgery? A Systematic Review and Meta-Analysis
Source: MDPI journal article supplement (doi:10.3390/ijerph18116165), 2021-06-07
Supplement: s1 [file s1]

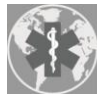

**Supplementary Table S1.** GRADE Profile of evidence

| Certainty assessment                                            |                       |              |                      |              |             |                      | N° of patients  |                  | Effect                        |                                                | Certainty   |
|-----------------------------------------------------------------|-----------------------|--------------|----------------------|--------------|-------------|----------------------|-----------------|------------------|-------------------------------|------------------------------------------------|-------------|
| N° of studies                                                   | Study design          | Risk of bias | Inconsistency        | Indirectness | Imprecision | Other considerations | WC              | NWC              | Relative (95% CI)             | Absolute (95% CI)                              |             |
| <b>Pain</b> <sup>16,25-27,32,41</sup>                           |                       |              |                      |              |             |                      |                 |                  |                               |                                                |             |
| 6                                                               | Observational studies | Serious      | Serious <sup>a</sup> | Not serious  | Not serious | None                 | 137/270 (50.7%) | 109/531 (20.5%)  | <b>RR 1.79</b> (1.32 to 2.42) | 16 more per 100 (from 7 more to 29 more)       | ⊕⊕○○<br>LOW |
| <b>Disability</b> <sup>16,18,24,25,27,28,36,40,41,45</sup>      |                       |              |                      |              |             |                      |                 |                  |                               |                                                |             |
| 10                                                              | Observational studies | Serious      | Serious <sup>b</sup> | Not serious  | Not serious | None                 | 438/666 (65.8%) | 347/1028 (33.8%) | <b>RR 1.38</b> (1.17 to 1.63) | 13 more per 100 (from 6 more to 21 more)       | ⊕⊕○○<br>LOW |
| <b>Return to work</b> <sup>25,26,28,29,33,41,43,44,46</sup>     |                       |              |                      |              |             |                      |                 |                  |                               |                                                |             |
| 9                                                               | Observational studies | Serious      | Serious <sup>b</sup> | Not serious  | Not serious | None                 | 182/355 (51.3%) | 216/915 (23.6%)  | <b>RR 1.68</b> (1.41 to 1.99) | 161 more per 1.000 (from 97 more to 234 more)  | ⊕⊕○○<br>LOW |
| <b>Satisfaction</b> <sup>23,25,26,29-31,33-35,37,39,43-46</sup> |                       |              |                      |              |             |                      |                 |                  |                               |                                                |             |
| 15                                                              | Observational studies | Serious      | Serious <sup>c</sup> | Not serious  | Not serious | None                 | 303/727 (41.7%) | 221/1114 (19.8%) | <b>RR 2.10</b> (1.82 to 2.44) | 218 more per 1.000 (from 163 more to 286 more) | ⊕⊕○○<br>LOW |

RR: Risk ratio; Explanations: a. I<sup>2</sup>=55%, Chi<sup>2</sup> p value = 0.07, b. I<sup>2</sup>=8
