# Supplementary material for: Does Workers’ Compensation Status Affect Outcomes after Lumbar Spine Surgery? A Systematic Review and Meta-Analysis
Source: MDPI journal article supplement (doi:10.3390/ijerph18116165), 2021-06-07
Supplement: s1 [file s1]

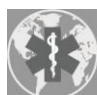

**Supplementary Table S2.** GRADE Summary of findings

| Outcomes                                                                                                                                                                                                                                    | Anticipated absolute effects*<br>(95% CI) |                               | Relative ef-<br>fect<br>(95% CI) | N° of partici-<br>pants<br>(studies)    | Certainty of<br>the evidence<br>(GRADE) |
|---------------------------------------------------------------------------------------------------------------------------------------------------------------------------------------------------------------------------------------------|-------------------------------------------|-------------------------------|----------------------------------|-----------------------------------------|-----------------------------------------|
|                                                                                                                                                                                                                                             | Risk with<br>NWC                          | Risk with<br>WC               |                                  |                                         |                                         |
| Pain                                                                                                                                                                                                                                        | 20 per 100                                | 37 per 100<br>(27 to 50)      | <b>RR 1.79</b><br>(1.32 to 2.42) | 801<br>(6 observa-<br>tional studies)   | ⊕⊕○○<br>LOW <sup>a</sup>                |
| Disability                                                                                                                                                                                                                                  | 34 per 100                                | 47 per 100<br>(39 to 55)      | <b>RR 1.38</b><br>(1.17 to 1.63) | 1694<br>(10 observa-<br>tional studies) | ⊕⊕○○<br>LOW <sup>b</sup>                |
| Return to work                                                                                                                                                                                                                              | 236 per 1.000                             | 397 per 1.000<br>(333 to 470) | <b>RR 1.68</b><br>(1.41 to 1.99) | 1270<br>(9 observa-<br>tional studies)  | ⊕⊕○○<br>LOW <sup>c</sup>                |
| Satisfaction                                                                                                                                                                                                                                | 198 per 1.000                             | 417 per 1.000<br>(361 to 484) | <b>RR 2.10</b><br>(1.82 to 2.44) | 1841<br>(15 observa-<br>tional studies) | ⊕⊕○○<br>LOW <sup>d</sup>                |
| <p>*The risk in the intervention group (and its 95% confidence interval) is based on the assumed risk in the comparison group and the relative effect of the intervention (and its 95% CI).<br/>CI: Confidence interval; RR: Risk ratio</p> |                                           |                               |                                  |                                         |                                         |
| <p>Explanations: a. I<sup>2</sup> = 55%, Chi<sup>2</sup> <i>p</i> value = 0.07, b. I<sup>2</sup> = 82%, c. I<sup>2</sup> = 67%</p>                                                                                                          |                                           |                               |                                  |                                         |                                         |
